# Supplementary material for: Thermal and Mechanical Characterization of Epoxy/Polyimide Blends via Postcuring Process
Source: MDPI journal article supplement (doi:10.3390/polym15051072), 2023-02-21
Supplement: s1 [file s1]

*Supplementary Information*

# **Thermal and Mechanical Characterization of Epoxy/Polyimide Blends via Post-Curing Process**

**Yong-Min Lee<sup>1</sup>, Kwan-Woo Kim<sup>1,†</sup>, Byung-Joo Kim<sup>2,†</sup>**

<sup>1</sup>Convergence Research Division, Korea Carbon Industry Promotion Agency, Jeonju 54852, Republic of Korea

<sup>2</sup>Department of Carbon-nanomaterials Engineering, Jeonju University, Jeonju 55069, Republic of Korea

Correspondence: kkw1988@kcarbon.or.kr; Tel.: +82 63 219 3713

Correspondence: kimbyungjoo@jj.ac.kr; Tel.: +82 63 220 3293

## Supporting table captions

**Table S1.** Nomenclature of Epoxy/Polyimide Blends Mixed with Stoichiometric Equivalent Ratio Equation

**Table S2.**  $T_{ci}$ ,  $T_{cp}$ ,  $T_{cf}$ , and  $\Delta T_{cif}$  Values of Epoxy/Polyimide Blends with Various Polyimide Contents

## Supporting Figure Captions

**Figure S1.** Chemical structures of epoxy, polyimide, and 4,4'-diaminodiphenylmethane.

**Figure S2.** Thermogravimetric analysis (TGA) thermograms of polyimide and NMP analyzed in N<sub>2</sub> gas atmosphere.

**Figure S3.** A schematic showing curing mechanisms of epoxy/polyimide and epoxy/DDM reaction.

**Figure S4.** Schematic representation of (a) epoxy/DDM and (b) epoxy/polyimide cross-linking network.

**Figure S5.** Schematic representation of S1, S2, and S3 for A\* and K\*.

**Table S1.** Nomenclature of Epoxy/Polyimide Blends According to Stoichiometric Equivalent Ratio Equation

| <b>Nomenclature</b> | <b>Epoxy (g)</b> | <b>DDM (g)</b> | <b>Polyimide (g)</b> | <b>Curing time (h)</b> | <b>Post curing time (h)</b> |
|---------------------|------------------|----------------|----------------------|------------------------|-----------------------------|
| EP                  | 100              | 26.09          | 0                    | 1                      | -                           |
| EPI-1               | 100              | 24.41          | 10                   | 1                      | -                           |
| EPI-2               |                  | 22.72          | 20                   |                        |                             |
| EPI-3               |                  | 21.04          | 30                   |                        |                             |
| EPI-4               |                  | 19.35          | 40                   |                        |                             |
| EPI-5               |                  | 17.67          | 50                   |                        |                             |
| EPI-5-1             | 100              | 17.67          | 50                   | 1                      | 1                           |
| EPI-5-5             |                  |                |                      |                        | 5                           |
| EPI-5-10            |                  |                |                      |                        | 10                          |

**Table S2.**  $T_{ci}$ ,  $T_{cp}$ ,  $T_{cf}$ , and  $\Delta T_{cif}$  Values of Epoxy/Polyimide Blends with Various Polyimide Contents

| <b>Sample</b> | <b><math>T_{ci}</math> (°C)</b> | <b><math>T_{cp}</math> (°C)</b> | <b><math>T_{cf}</math> (°C)</b> | <b><math>\Delta T_{cif}</math> (°C)</b> |
|---------------|---------------------------------|---------------------------------|---------------------------------|-----------------------------------------|
| EP            | 126.20                          | 168.05                          | 205.77                          | 79.57                                   |
| EPI-1         | 116.70                          | 166.32                          | 204.58                          | 87.88                                   |
| EPI-2         | 114.87                          | 162.39                          | 218.94                          | 104.07                                  |
| EPI-3         | 101.68                          | 163.64                          | 231.80                          | 130.12                                  |
| EPI-4         | 105.51                          | 165.18                          | 237.23                          | 131.72                                  |
| EPI-5         | 103.25                          | 167.62                          | 239.01                          | 135.76                                  |

$T_{ci}$ : Initial curing temperature

$T_{cp}$ : Curing peak temperature

$T_{cf}$ : Curing finish temperature

$\Delta T_{cif}$ : Range of curing temperature

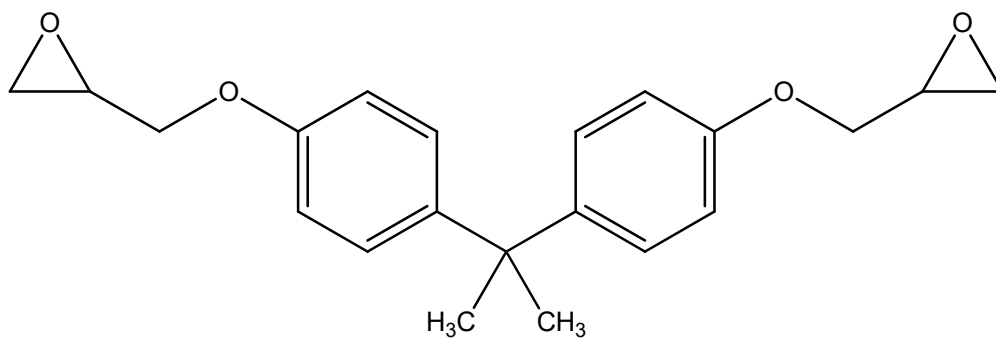

Epoxy resin (DGEBA)

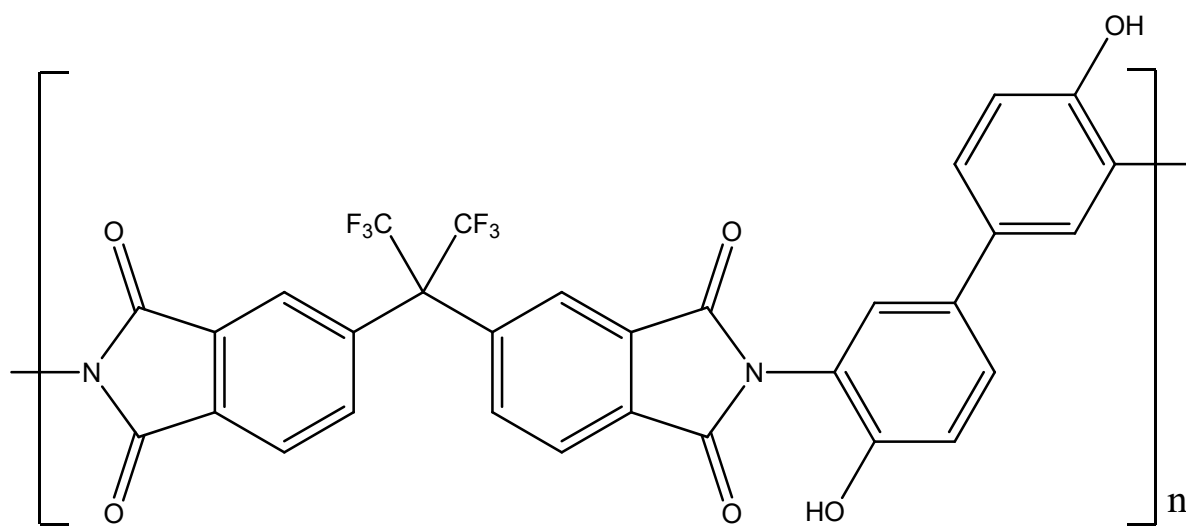

Polyimide

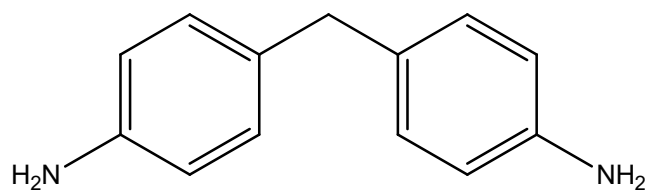

4,4'-Diaminodiphenylmethane

**Figure S1.** Chemical structures of epoxy, polyimide, and 4,4'-diaminodiphenylmethane.

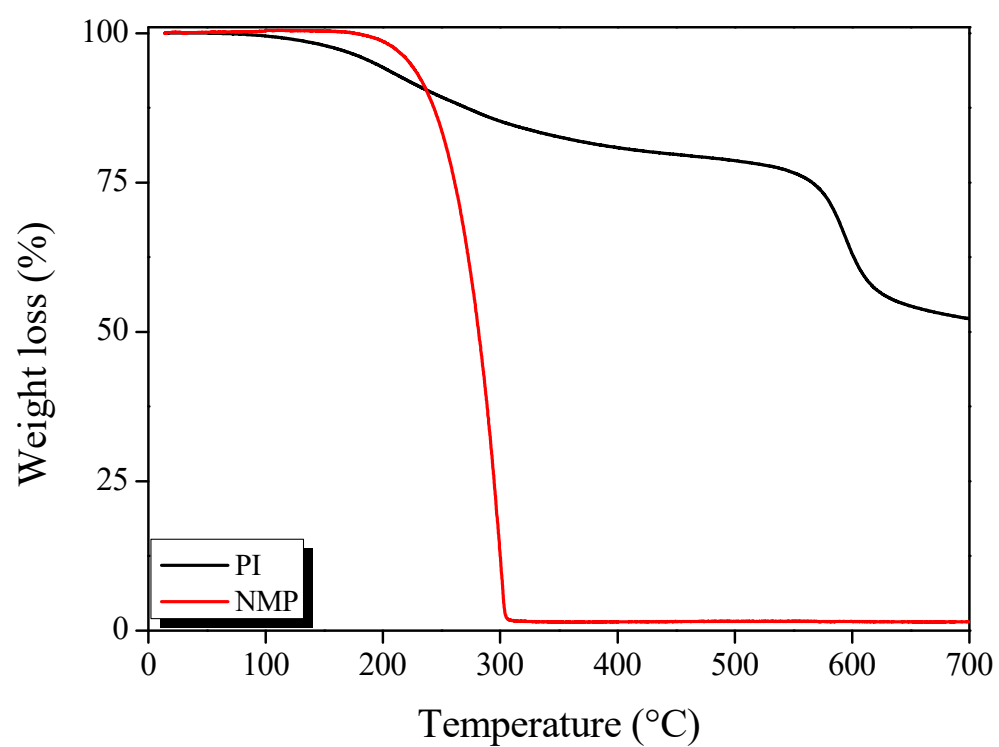

**Figure S2.** Thermogravimetric analysis (TGA) thermograms of polyimide and NMP analyzed in N<sub>2</sub> gas atmosphere.

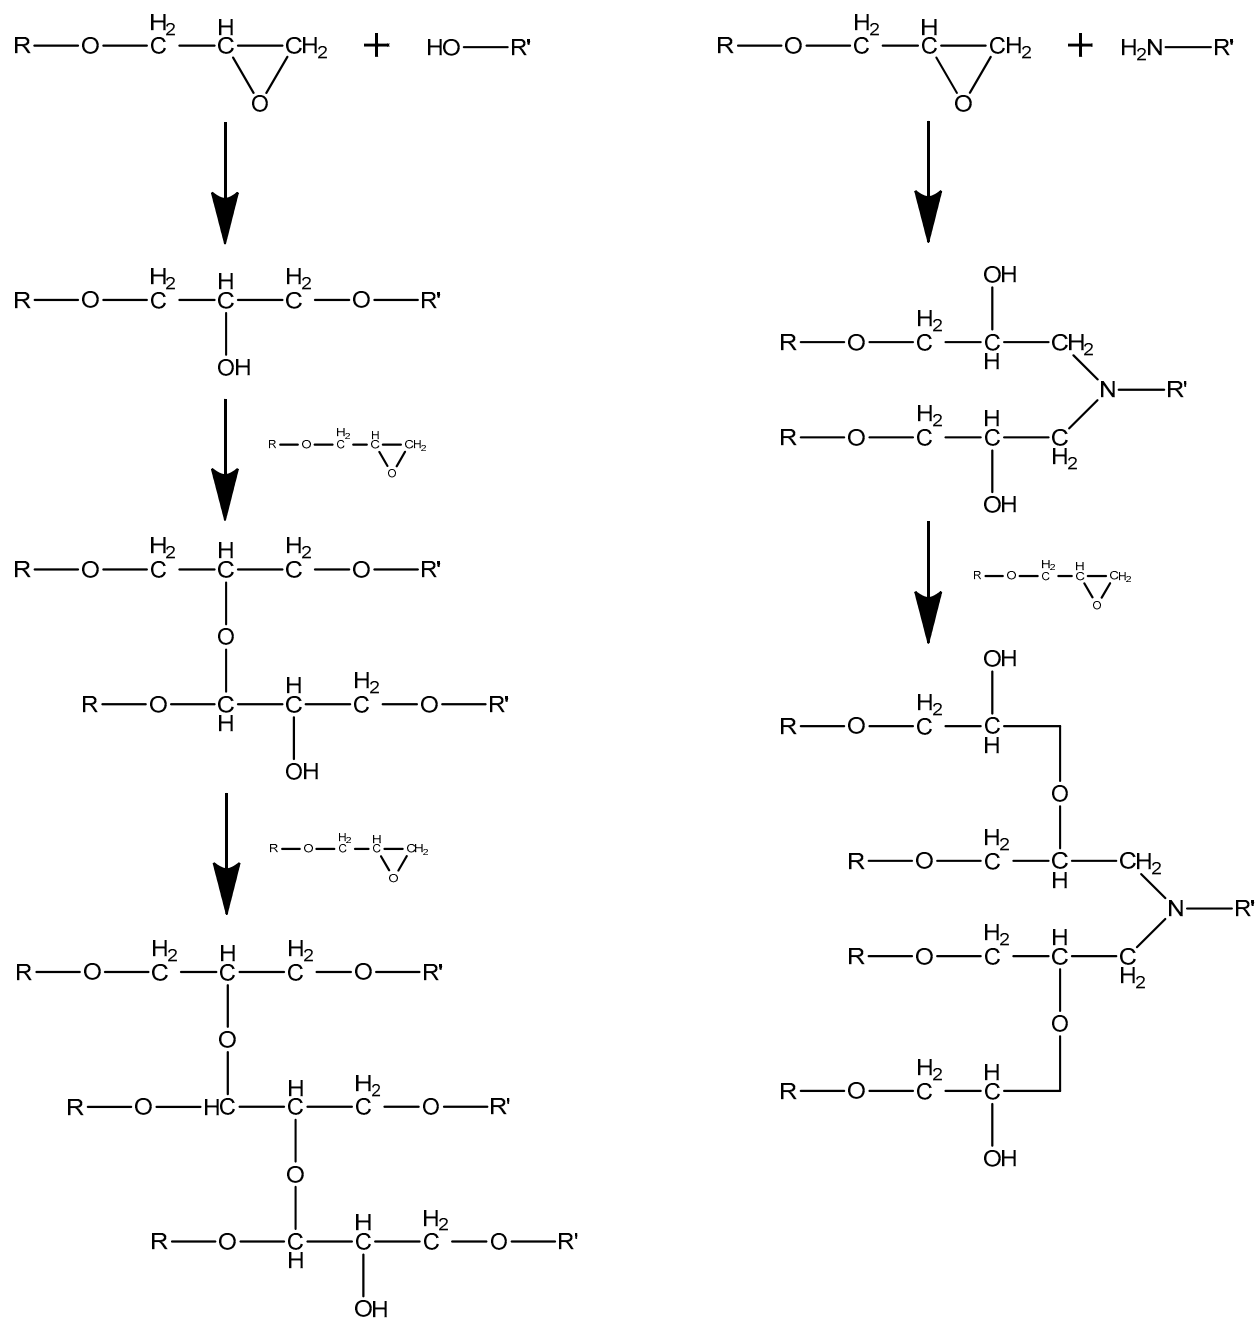

**Figure S3.** A schematic showing curing mechanisms of epoxy/polyimide and epoxy/DDM reaction.

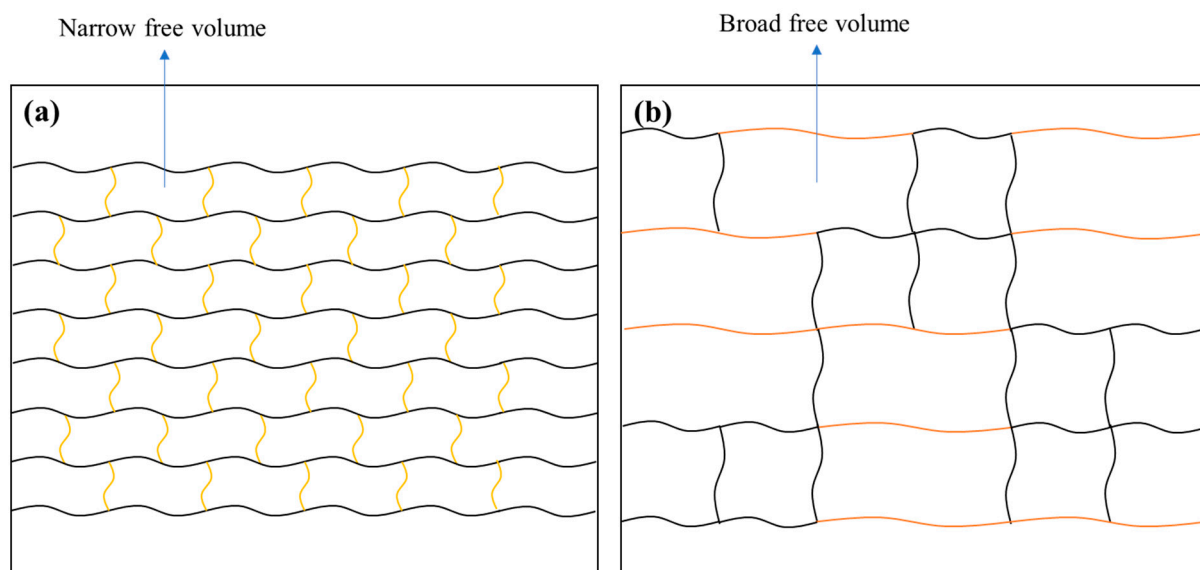

**Figure S4.** Schematic representation of (a) epoxy/DDM and (b) epoxy/polyimide cross-linking network.

\*Black line: epoxy

\*\*Yellow line: DDM

\*\*\*Orange line: polyimide

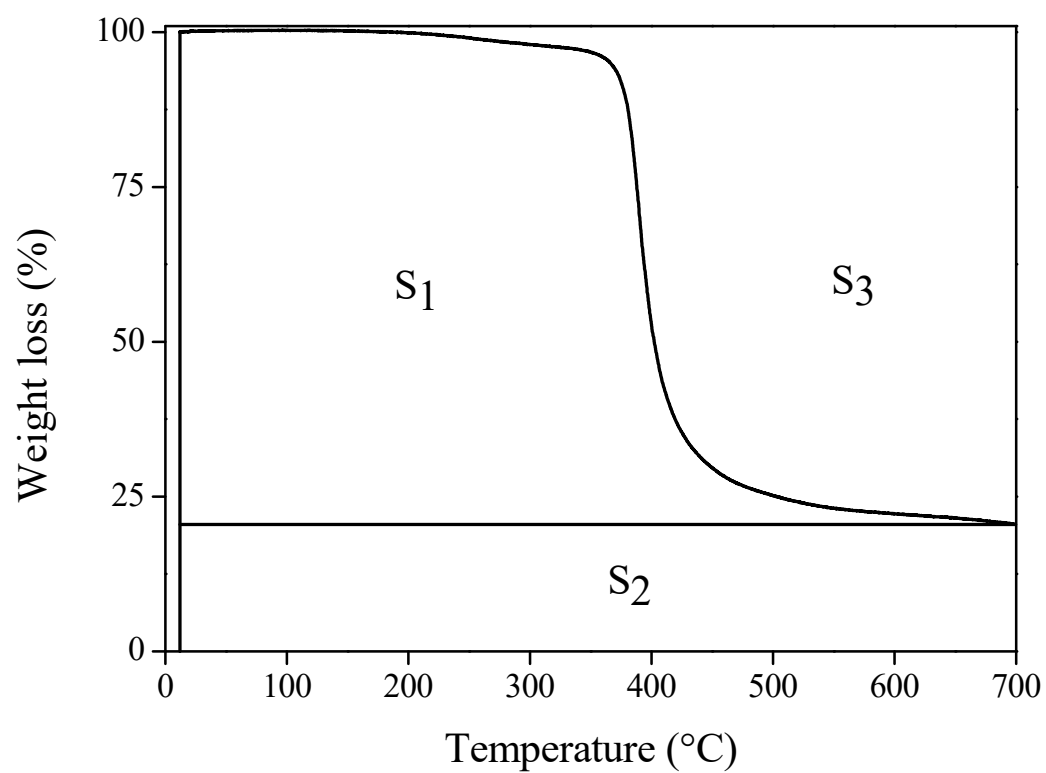

**Figure S5.** Schematic representation of S<sub>1</sub>, S<sub>2</sub>, and S<sub>3</sub> for A\* and K\*.
